# Supplementary material for: Nanomechanics of the molecular complex between staphylococcal adhesin SpsD and elastin
Source: Royal Society of Chemistry journal article supplement (doi:10.1039/d0nr02745f), 2020-01-01
Supplement: d0nr02745f1.pdf [file d0nr02745f1.pdf]

*Supplementary information*

**Nanomechanics of the molecular complex between  
staphylococcal adhesin SpsD and elastin**

Marion Mathelié-Guinlet<sup>1</sup>, Constance Chantraine<sup>1</sup>, Felipe Viela<sup>1</sup>, Giampiero Pietrocola<sup>2</sup>, Pietro Speziale<sup>2</sup>, and Yves F. Dufrêne<sup>1,3</sup>

<sup>1</sup>Louvain Institute of Biomolecular Science and Technology, UCLouvain, Croix du Sud, 4-5, bte L7.07.07, B-1348 Louvain-la-Neuve, Belgium

<sup>2</sup>Department of Molecular Medicine, Unit of Biochemistry, University of Pavia, Viale Taramelli 3/b, 27100 Pavia, Italy

<sup>3</sup>Walloon Excellence in Life sciences and Biotechnology (WELBIO), B-1300 Wavre, Belgium

\*Corresponding authors:

Yves Dufrêne: [yves.dufrene@uclouvain.be](mailto:yves.dufrene@uclouvain.be)

Pietro Speziale: [pspeziale@unipv.it](mailto:pspeziale@unipv.it)

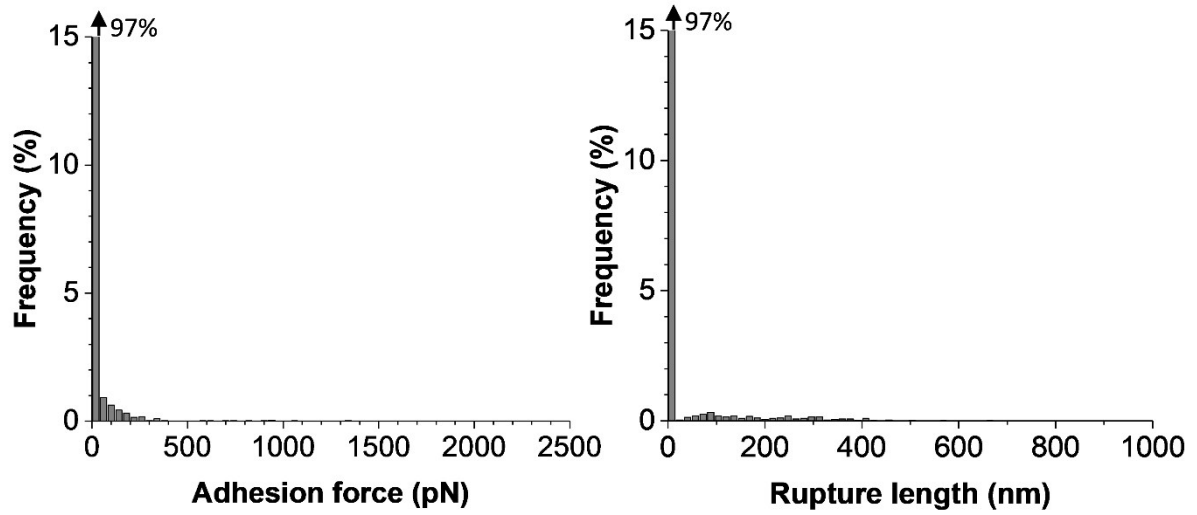

**Figure S1. Binding specificity of SpsD and SpsL to elastin.** Adhesion force and rupture length histograms obtained for six *S. pseudintermedius*  $\Delta$ spsD $\Delta$ spsL cells interacting with elastin-tips.

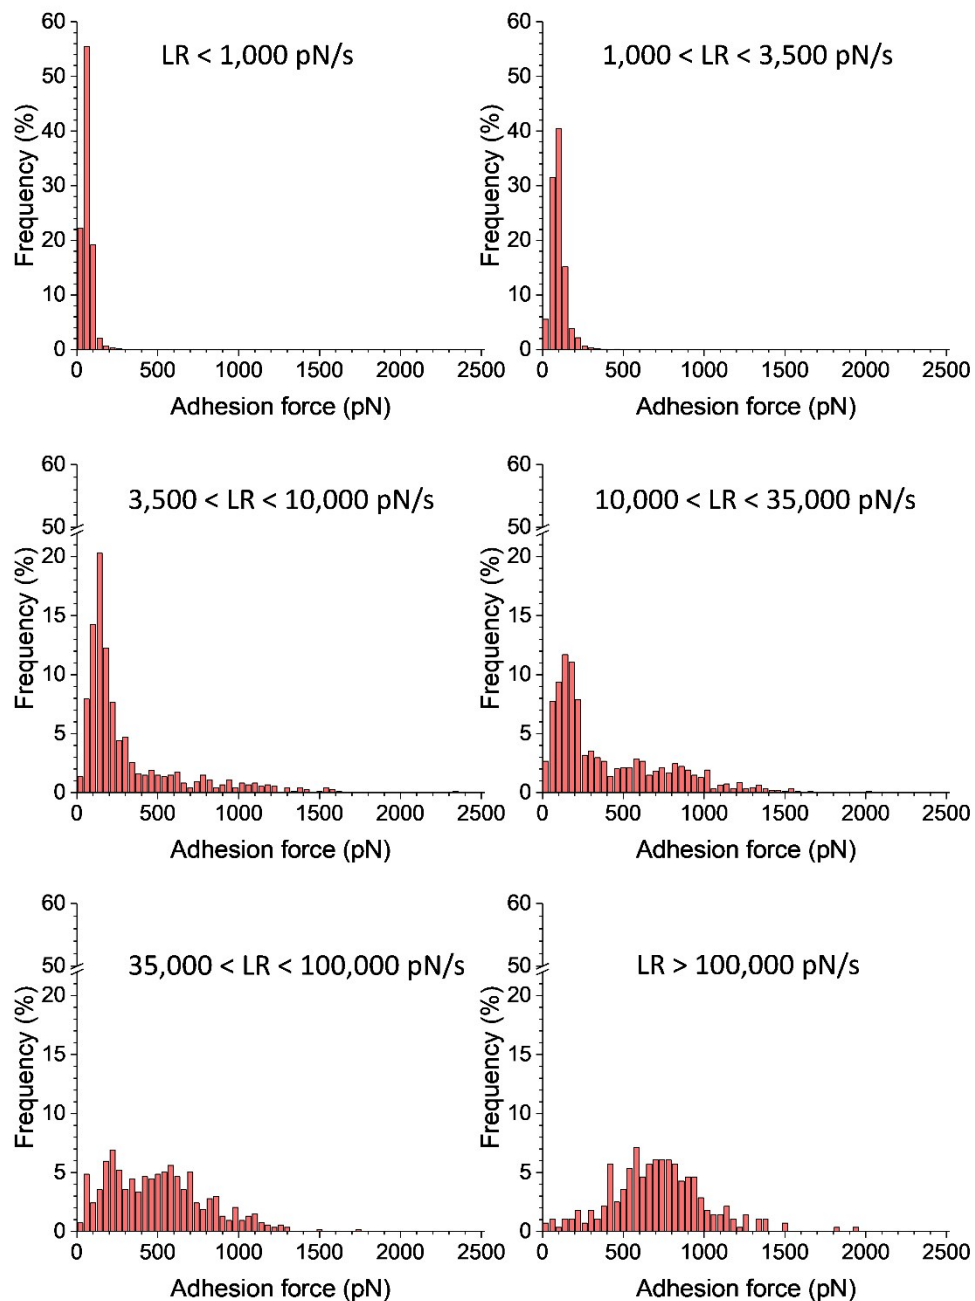

**Figure S2. Strong interactions are favored at high loading rates.** Adhesion forces were measured at various loading rates (*LRs*) between SpsD cells and elastin-tips (Fig. 4A). Small ranges of *LRs* were binned and the force distribution plotted as histograms (data pooled from 4,424 adhesive events on five cells).
